# Supplementary material for: Salivary Effector Sm9723 of Grain Aphid Sitobion miscanthi Suppresses Plant Defense and Is Essential for Aphid Survival on Wheat
Source: MDPI journal article supplement (doi:10.3390/ijms23136909), 2022-06-21
Supplement: s1 [file s1]

**Table S1.** All primers used for PCR, qRT-PCR and construction.

| Primer name                       | Sequence (5'-3')                               | Purpose                                                  |
|-----------------------------------|------------------------------------------------|----------------------------------------------------------|
| <i>Sm9723-F</i>                   | ATGAAATTGAACACATCACTT                          | Gene cloning of full coding sequence                     |
| <i>Sm9723-R</i>                   | CTACGCGATAGTACGTCTACGT                         |                                                          |
| <i>Sm9723<sup>SP</sup>-F</i>      | ATTGACTTCGACGAAGAAGAGT                         | Gene cloning of coding sequence excluding signal peptide |
| <i>Sm9723<sup>SP</sup>-R</i>      | CTACGCGATAGTACGTCTACGT                         |                                                          |
| <i>Sm9723-q-F</i>                 | ACATCCTGTTAGCCAAGGCC                           | RT-qPCR for aphid                                        |
| <i>Sm9723-q-R</i>                 | CACCGGGTTTGTTCGAGAGA                           |                                                          |
| <i><math>\beta</math>-actin-F</i> | CGTTACCAACTGGGACGATATG                         |                                                          |
| <i><math>\beta</math>-actin-R</i> | GGGTTCAATGGAGCTTCTGTTA                         |                                                          |
| <i>NADH-F</i>                     | CGAGGAGAACATGCTCTTAGAC                         |                                                          |
| <i>NADH-R</i>                     | GATAGCTTGGGCTGGACATATAG                        |                                                          |
| <i>Sm9723-F-SacI</i>              | cgagctcATGAAATTGAACACATCACTT                   | Transient overexpression                                 |
| <i>Sm9723-R-XbaI</i>              | gctctagaCGCGATAGTACGTCTACGT                    |                                                          |
| <i>Sm9723<sup>SP</sup>-F-SacI</i> | cgagctcATGATTGACTTCGACGAAGAAG                  |                                                          |
| <i>Sm9723<sup>SP</sup>-R-XbaI</i> | gctctagaCGCGATAGTACGTCTACGT                    |                                                          |
| <i>dsSm9723-F</i>                 | taatacgactcactataggg<br>ATTGACTTCGACGAAGAAGAGT | RNAi                                                     |
| <i>dsSm9723-R</i>                 | taatacgactcactataggg<br>CTACGCGATAGTACGTCTACGT |                                                          |
| <i>NbPAL-F</i>                    | GTTATGCTCTTAGAACGTCGCCC                        | RT-qPCR for <i>N. benthamiana</i>                        |
| <i>NbPAL-R</i>                    | CCGTGTAATGCCTTGTTTCTTGA                        |                                                          |
| <i>NbPR1a-F</i>                   | CGACCAGGTAGCAGCCTATG                           |                                                          |
| <i>NbPR1a-R</i>                   | TCTCAACAGCCTTAGCAGCC                           |                                                          |
| <i>NbLOX-F</i>                    | AAAACCTATGCCTCAAGAAC                           |                                                          |
| <i>NbLOX-R</i>                    | ACTGCTGCATAGGCTTTGG                            |                                                          |
| <i>NbFAD-F</i>                    | CATGTGGCTTGACTTAGTTACCTACT                     |                                                          |
| <i>NbFAD-R</i>                    | CCCTGACTTCTTTGGCTCCTT                          |                                                          |
| <i>NbActin-F</i>                  | GTTGCTATACAAGCTGTTCTCTCG                       |                                                          |
| <i>NbActin-R</i>                  | GTCAAGACGAAGAATGACATGTGG                       |                                                          |
